# Supplementary material for: Integrating Boronic Esters and Anthracene into Covalent Adaptable Networks toward Stimuli-Responsive Elastomers
Source: MDPI journal article supplement (doi:10.3390/polym14061104), 2022-03-10
Supplement: s1 [file s1]

Supporting Information

# Integrating Boronic Esters and Anthracene into Covalent Adaptable Networks toward Stimuli-Responsive Elastomers

Zhiyong Liu <sup>1</sup>, Youwei Ma <sup>2</sup>, Yixin Xiang <sup>1</sup>, Xianrong Shen <sup>1</sup>, Zixing Shi <sup>2,\*</sup> and Jiangang Gao <sup>1,\*</sup>

<sup>1</sup> Department of Polymer Materials and Engineering, School of Chemical and Environmental Engineering, Anhui Polytechnic University, Wuhu 241000, China; liuzhiyong@ahpu.edu.cn (Z.L.); xiangyixin@ahpu.edu.cn (Y.X.); shenxianrong@ahpu.edu.cn (X.S.)

<sup>2</sup> State Key Laboratory for Metal Matrix Composite Materials and Shanghai Key Laboratory of Electrical Insulation & Thermal Ageing, School of Chemistry and Chemical Engineering, Shanghai Jiao Tong University, Shanghai 200240, China; mayouwei1995@sjtu.edu.cn

\* Correspondence: zxshi@sjtu.edu.cn (Z.S.); gaojiangang@ahpu.edu.cn (J.G.)

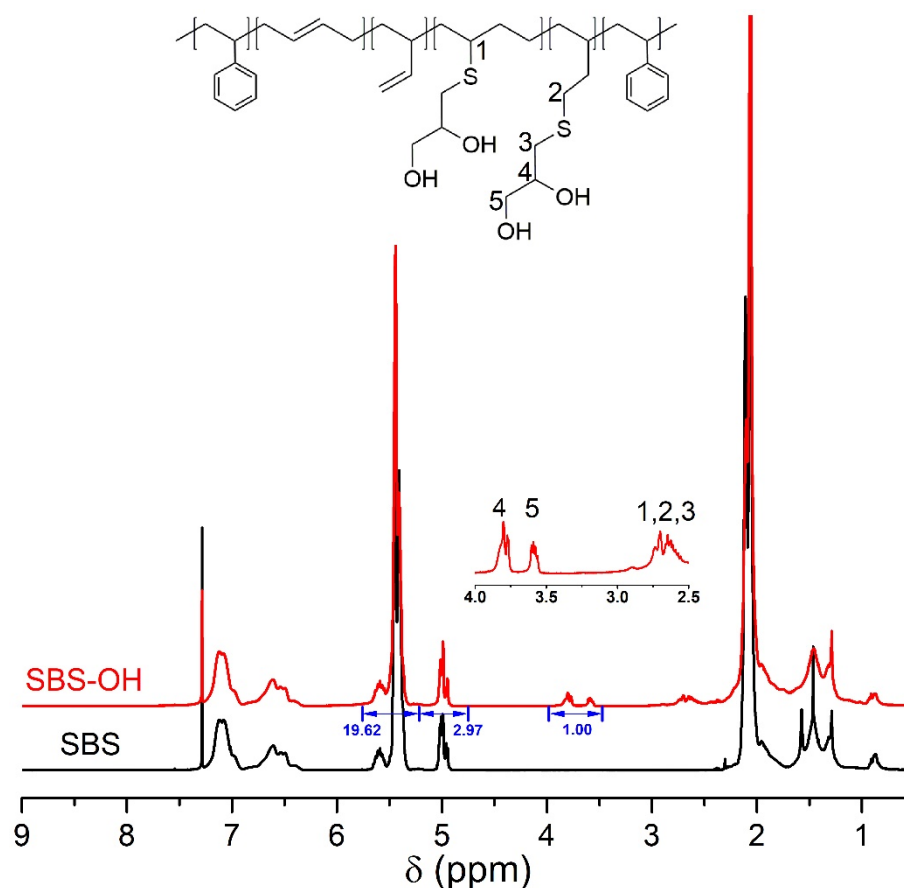

Figure S1. <sup>1</sup>H NMR spectra of SBS and SBS-OH.

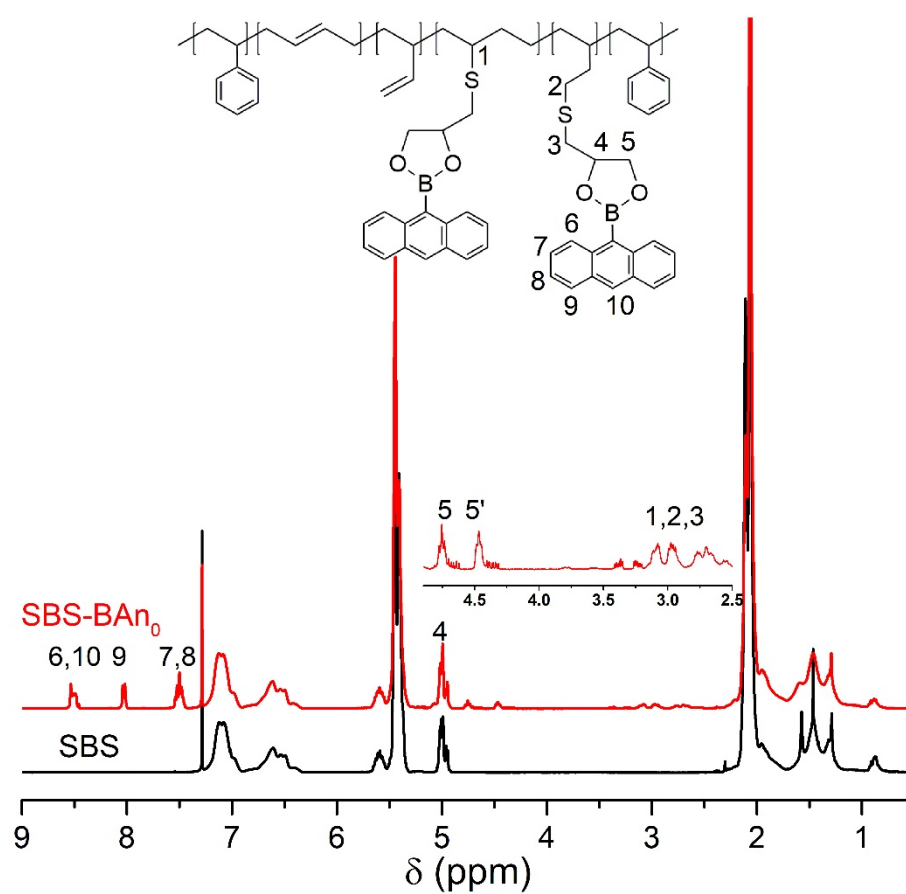

**Figure S2.**  $^1\text{H}$  NMR spectra of SBS and SBS-BAn<sub>0</sub>, in which “0” means the obtained elastomer without ultraviolet radiation.

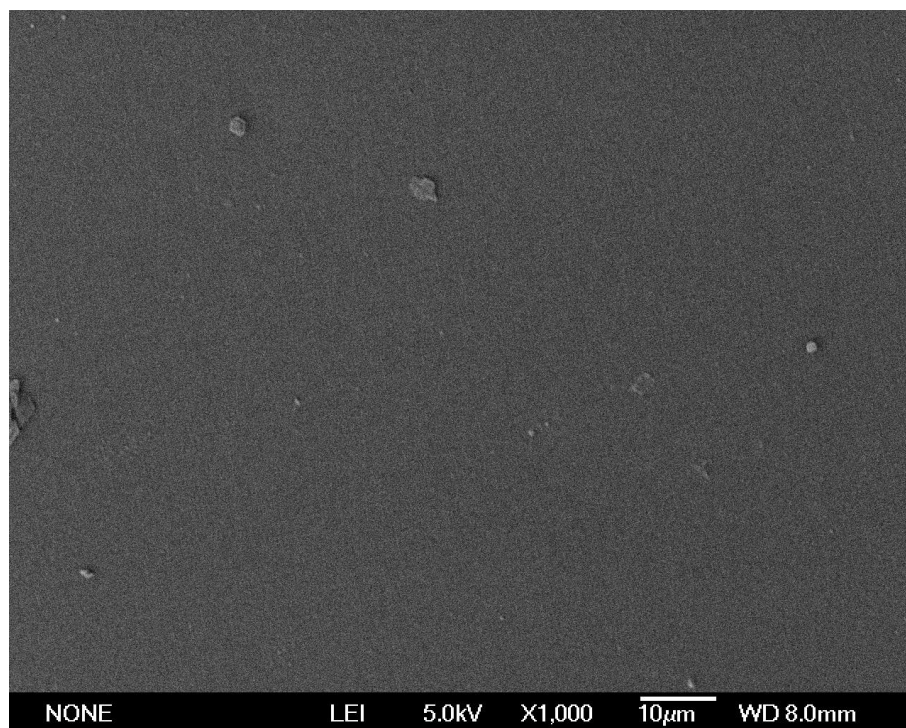

**Figure S3.** The SEM image of SBS-BAn<sub>30</sub>.

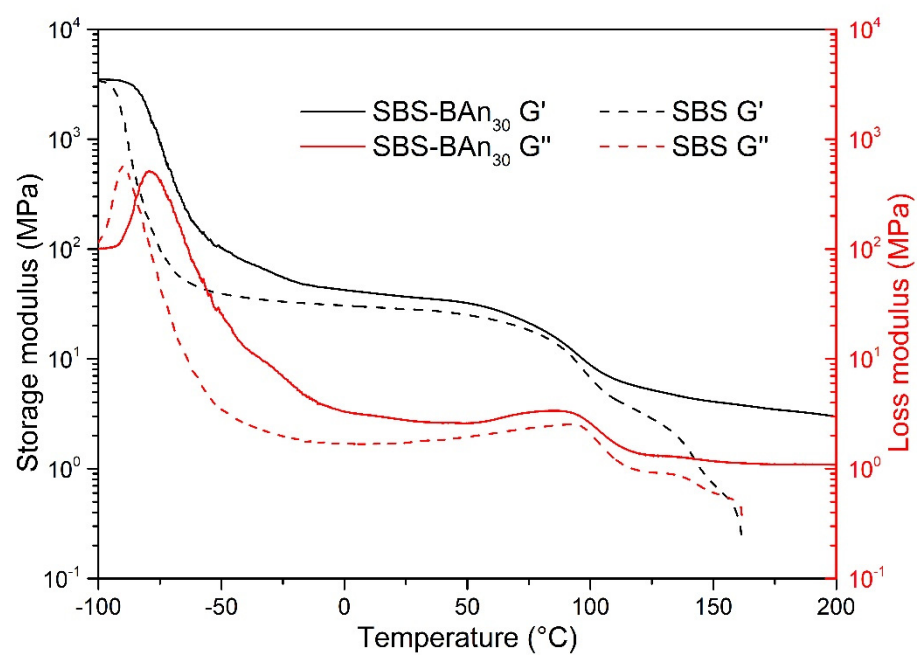

Figure S4. The DMA curves of SBS and SBS-BAn<sub>30</sub>.

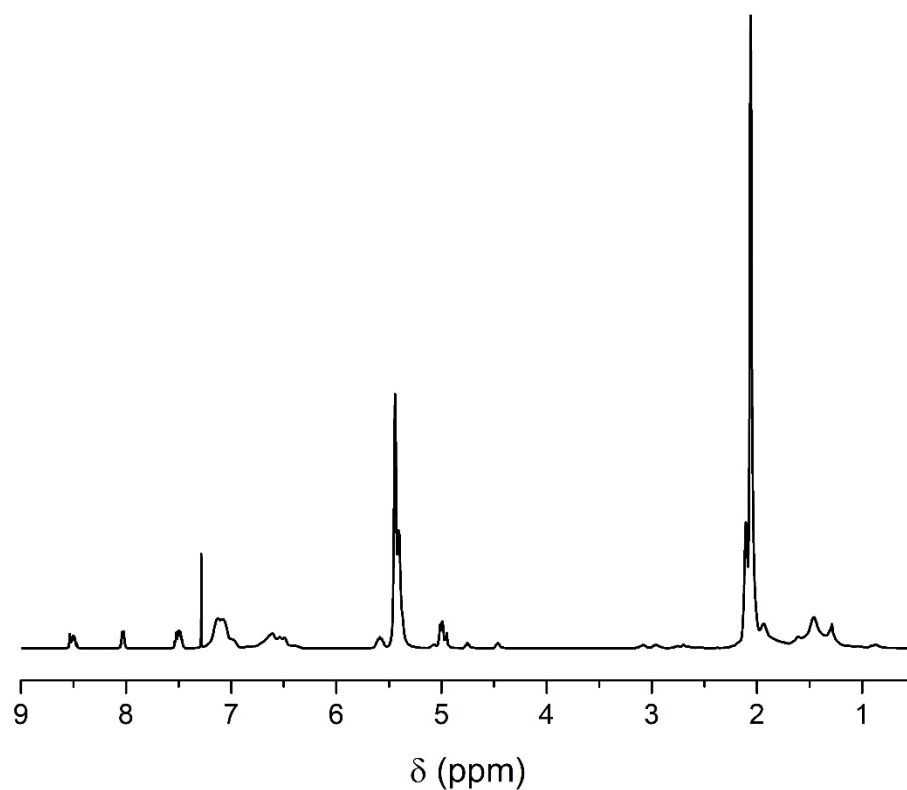

Figure S5. <sup>1</sup>H NMR spectrum of the resulted polymer after heating SBS-BAn<sub>30</sub> for 30min at 160°C.

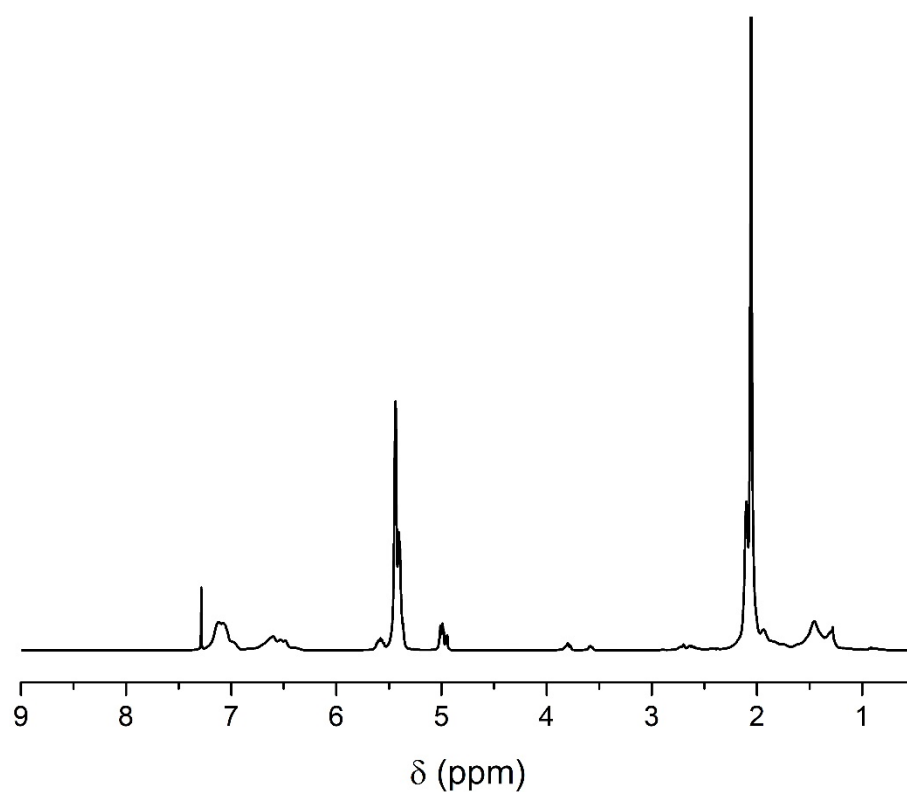

**Figure S6.**  $^1\text{H}$  NMR spectrum of the polymer extracted from the benzyl alcohol resulted solution.

**Table S1.** Summarized properties of SBS-BAn<sub>x</sub>.

| Sample                | GF (%) | SR (%)   | Strain at break (%) | Stress at break (MPa) |
|-----------------------|--------|----------|---------------------|-----------------------|
| SBS-BAn <sub>2</sub>  | 50 ± 2 | 890 ± 40 | 2239 ± 200          | 14.83 ± 2             |
| SBS-BAn <sub>5</sub>  | 65 ± 2 | 708 ± 33 | 1463 ± 120          | 15.83 ± 2             |
| SBS-BAn <sub>30</sub> | 73 ± 3 | 600 ± 36 | 1209 ± 100          | 21.94 ± 3             |

**Table S2.** Summarized properties of SBS-BAn<sub>30</sub> heat for different times at 160°C.

| Sample   | Strain at break (%) | Stress at break (MPa) |
|----------|---------------------|-----------------------|
| Original | 1209 ± 100          | 21.94 ± 3             |
| 10min    | 1781 ± 130          | 15.62 ± 2             |
| 30min    | 2547 ± 200          | 13.17 ± 2             |
